# Supplementary material
Source: ML conference proceedings conference paper supplement (https://openaccess.thecvf.com/content/WACV2024/html/Wu_Learning_Better_Keypoints_WACV_2024_paper.html)
Supplement: Supplementary file 1 [file Wu_Learning_Better_Keypoints_WACV_2024_supplemental.pdf]

# Learning Better Keypoints for Multi-Object 6DoF Pose Estimation

Yangzheng Wu , Michael Greenspan

RCV Lab, Dept. of Electrical and Computer Engineering, Ingenuity Labs,

Queen’s University, Kingston, Ontario, Canada

{y.wu, michael.greenspan}@queensu.ca

## S.1. Overview

We document here the network structure, some additional results, and one more ablation study. The network diagram is shown in Figure. S.1. It is directly taken from the classification structure of edge-conv [2] with a few changes to the number of intermediate channels and the shape of the output vector. The per category KeyGNet results of LMO and YCB-V datasets evaluated by ADD(S) and ADD(S) AUC in both SISO and MIMO modes on all three methods tested are shown in Table. S.2, Table. S.3, and Table. S.4. KeyGNet keypoints improved the performance for all objects, in all datasets, among all three methods tested. The BOP  $AR$  (Average Recall) of Visible Surface Discrepancy ( $AR_{VSD}$ ), Maximum Symmetry-Aware Surface Distance ( $AR_{MSSD}$ ), Maximum Symmetry-Aware Projection Distance ( $AR_{MSPD}$ ), and the overall average are reported in Table. S.5. All these metrics are improved in all six core datasets when the KeyGNet keypoints are used. Last but not least, the SISO-MIMO gap is reduced by using KeyGNet keypoints for all objects in YCB-V, as shown in Table. S.6.

## S.2. Classical Distance Measure vs. KeyGNet

Instead of training a network, keypoints can be selected by measuring the Wasserstein distance directly on a collection of sets of keypoints. We conduct a test by comparing the trained KeyGNet with a classical RANSAC [1] style algorithm. The collection of initial keypoint sets are selected either relatively randomly in a region centered at the bounding box’s corners, or completely randomly in a sphere within the object reference frame of the CAD model. The Wasserstein distances and the dispersion scores are then calculated for each set of the keypoints. The algorithm repeats for  $N$  times and the keypoints with the minimum Wasserstein distances and the maximum dispersion scores are selected.

We test the keypoints using RCVPose on LMO and compare the ADD(S) metric with KeyGNet. The results are shown in Table. S.1. It can be seen that the keypoints selected with an initial location of bounding box corners are

| LMO Object  | Random |             | KGN         |
|-------------|--------|-------------|-------------|
|             | BBox   | Sphere      |             |
| ape         | 53.7   | <u>55.2</u> | <b>65</b>   |
| can         | 80.8   | <u>83.2</u> | <b>96.4</b> |
| cat         | 44.1   | <u>47.3</u> | <b>58</b>   |
| driller     | 70.6   | <u>73.4</u> | <b>82.1</b> |
| duck        | 42.1   | <u>48.2</u> | <b>65.6</b> |
| eggbox      | 70.1   | <u>74.3</u> | <b>82.2</b> |
| glue        | 66.2   | <u>67.3</u> | <b>75.1</b> |
| holepuncher | 68.5   | <u>72.5</u> | <b>81.2</b> |
| average     | 62     | <u>65.2</u> | <b>75.6</b> |

Table S.1. ADD(S) of RCVPose [3] on LMO using keypoints selected randomly (BBox, Sphere) vs. with KeyGNet (KGN). The randomly selected keypoints use RANSAC to minimize the Wasserstein distance measure.

3.2% on average worse than those selected with completely random initial locations. This is possibly due to the restrictions caused by the initial input locations of BBox corners. The learned KeyGNet keypoints have the best performance for all objects in LMO, boosting the ADD(S) by 13.6% and 10.4% compared to those randomly selected.

## References

- [1] Martin A Fischler and Robert C Bolles. Random sample consensus: a paradigm for model fitting with applications to image analysis and automated cartography. *Communications of the ACM*, 24(6):381–395, 1981. 1
- [2] Yue Wang, Yongbin Sun, Ziwei Liu, Sanjay E Sarma, Michael M Bronstein, and Justin M Solomon. Dynamic graph cnn for learning on point clouds. *Acm Transactions On Graphics (tog)*, 38(5):1–12, 2019. 1, 2
- [3] Yangzheng Wu, Mohsen Zand, Ali Etemad, and Michael Greenspan. Vote from the center: 6 dof pose estimation in rgb-d images by radial keypoint voting. In *Computer Vision–ECCV 2022: 17th European Conference, Tel Aviv, Israel, October 23–27, 2022, Proceedings, Part X*, pages 335–352. Springer, 2022. 1

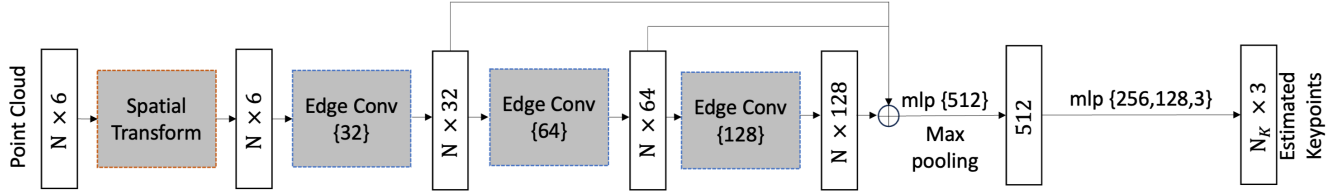

Figure S.1. KeyGNet Network Structure. The network is based on the classification structure of edge-conv [2]. The spatial transform block and edge-conv blocks are exactly the same as in the original setup. The output vector is reshaped to  $N_K \times 3$  keypoints.

| LMO<br>object | SISO  |           |       |             |         |             | MIMO  |              |       |             |         |              |
|---------------|-------|-----------|-------|-------------|---------|-------------|-------|--------------|-------|-------------|---------|--------------|
|               | PVNet |           | PVN3D |             | RCVPose |             | PVNet |              | PVN3D |             | RCVPose |              |
|               | FPS   | KGn       | FPS   | KGn         | BBox    | KGn         | FPS   | KGn          | FPS   | KGn         | BBox    | KGn          |
| ape           | 15.8  | 21.2      | 33.9  | 40.2        | 61.3    | <b>65.4</b> | 8.2   | 20.9         | 25.7  | 39.9        | 57.1    | <u>65</u>    |
| can           | 63.3  | 74.2      | 88.6  | <u>93.7</u> | 93      | <b>96.4</b> | 51.1  | 74.2         | 77.4  | <u>93.7</u> | 90.1    | <b>96.4</b>  |
| cat           | 16.7  | 22.3      | 39.1  | 49.2        | 51.2    | <b>58.2</b> | 9.6   | 22.3         | 31.5  | 48.9        | 45.5    | <u>58</u>    |
| driller       | 65.7  | 76.6      | 78.4  | 88.3        | 78.8    | <u>81.7</u> | 57.5  | 76.6         | 68.1  | 88.3        | 77.5    | <b>82.1</b>  |
| duck          | 25.2  | 30.2      | 41.9  | 47.6        | 53.4    | <u>65.2</u> | 14.1  | 29.9         | 32.2  | 47.2        | 46.2    | <b>65.6</b>  |
| eggbox        | 50.2  | 57.8      | 80.9  | 85.2        | 82.3    | <u>82</u>   | 38    | 57.8         | 70.7  | 85.2        | 80.2    | <b>82.2</b>  |
| glue          | 49.6  | 59.7      | 68.1  | 77.2        | 72.9    | <u>74.9</u> | 42.9  | 59.7         | 58.3  | 76.8        | 66.6    | <b>75.1</b>  |
| holepuncher   | 39.7  | 42.3      | 74.7  | 82.3        | 75.8    | <u>81.2</u> | 32.4  | 42.3         | 67.5  | <b>82.3</b> | 73.7    | <u>81.2</u>  |
| average       | 40.8  | 48 (+7.2) | 63.2  | 70.5 (+7.3) | 71.1    | 75.5 (+4.4) | 31.7  | 47.9 (+16.2) | 53.9  | 70.3        | 64.8    | 75.6 (+10.8) |

Table S.2. LMO Results: The ADD(S) AUC comparison of three keypoint voting-based methods (PVNet, PVN3D, RCVPose) using initially defined keypoints (FPS, BBox) and optimized keypoints (KGn) generated by KeyGNet.

| YCB<br>object          | PVNet |      | PVN3D |             | RCVPose     |             |
|------------------------|-------|------|-------|-------------|-------------|-------------|
|                        | FPS   | KGn  | FPS   | KGn         | BBox        | KGn         |
| 002_master_chef_can    | 54.6  | 69.5 | 75.3  | 84.8        | <u>92.1</u> | <b>95.1</b> |
| 003_cracker_box        | 66.2  | 78.8 | 87.0  | <b>96.5</b> | 94.3        | <u>96.4</u> |
| 004_sugar_box          | 66.3  | 76.1 | 90.9  | <u>96.5</u> | 94.2        | <b>97.7</b> |
| 005_tomato_soupcan     | 62.2  | 74.7 | 81.5  | <u>92.8</u> | 91.5        | <b>96.7</b> |
| 006_mustard_bottle     | 67.6  | 82.4 | 89.3  | <b>97.7</b> | 94.2        | <u>96.9</u> |
| 007Auna_fish_can       | 64.9  | 77.0 | 87.0  | <u>95.7</u> | 94.2        | <b>96.4</b> |
| 008_pudding_box        | 76.6  | 85.2 | 90.3  | <b>97.5</b> | 95.4        | <u>97.0</u> |
| 009_gelatin_box        | 71.4  | 88.8 | 90.6  | <b>97.5</b> | 92.6        | <u>97.4</u> |
| 010_potted_meat_can    | 69.5  | 84.1 | 82.5  | <u>93.7</u> | 88.1        | <b>93.9</b> |
| 011_banana             | 67.9  | 76.8 | 90.9  | <u>97.2</u> | 94.9        | <b>97.5</b> |
| 019_pitcher_base       | 67.8  | 76.9 | 88.1  | <u>97.5</u> | 93.1        | <b>97.9</b> |
| 021_bleach_cleanser    | 70.2  | 74.9 | 92.2  | <u>96.6</u> | 95.4        | <b>98.4</b> |
| 024_bowl*              | 66.9  | 78.3 | 87.3  | <u>95.6</u> | 91.0        | <b>97.3</b> |
| 025_mug                | 71.5  | 79.8 | 91.8  | <u>96.5</u> | 94.2        | <b>96.9</b> |
| 035_power_drill        | 67.6  | 81.7 | 89.2  | <u>96.9</u> | 93.7        | <b>97.5</b> |
| 036_wood_block*        | 57.4  | 85.2 | 82.9  | <u>92.8</u> | 89.7        | <b>93.3</b> |
| 037_scissors           | 64.2  | 80.4 | 83.2  | 91.5        | <u>92.3</u> | <b>95.9</b> |
| 040_large_marker       | 65.5  | 81.9 | 84.2  | <u>88.0</u> | 86.5        | <b>95.6</b> |
| 051_large_clamp*       | 55.7  | 66.5 | 84.4  | 88.5        | <u>90.5</u> | <b>97.6</b> |
| 052_extra_large_clamp* | 52.6  | 61.4 | 77.8  | <u>94.1</u> | 92.5        | <b>96.0</b> |
| 061_loam_brick*        | 60.9  | 79.6 | 89.4  | <b>97.8</b> | 92.2        | <u>97.2</u> |
| average                | 65.1  | 78.1 | 86.5  | <u>94.6</u> | 92.5        | <b>96.6</b> |

Table S.3. YCB-V Results. The ADD(S) AUC comparison of three keypoint voting-based methods (PVNet, PVN3D, RCVPose) in MIMO mode using initially defined keypoints (FPS, BBox) and optimized keypoints (KGn) generated by KeyGNet.

| YCB<br>object          | PVNet |      | PVN3D       |             | RCVPose     |             |
|------------------------|-------|------|-------------|-------------|-------------|-------------|
|                        | FPS   | KGN  | FPS         | KGN         | BBox        | KGN         |
| 002_master_chef_can    | 60.2  | 70   | 79.3        | 85.2        | <u>94.7</u> | <b>96.2</b> |
| 003_cracker_box        | 70.7  | 79.4 | 91.5        | <u>96.7</u> | 96.4        | <b>97.4</b> |
| 004_sugar_box          | 73.2  | 76.6 | 96.9        | 97.3        | <u>97.6</u> | <b>98.7</b> |
| 005_tomato_soupcan     | 67.7  | 75.1 | 89.0        | 93.2        | <u>95.4</u> | <b>97.6</b> |
| 006_mustard_bottle     | 76.5  | 83   | <u>97.9</u> | <b>98.2</b> | 97.7        | <b>98.2</b> |
| 007Auna_fish_can       | 71.3  | 77.2 | 90.7        | 96.3        | <u>96.7</u> | <b>97.4</b> |
| 008_pudding_box        | 80.1  | 85.4 | 97.1        | <b>98.1</b> | 97.4        | <u>97.9</u> |
| 009_gelatin_box        | 81.2  | 89.1 | <b>98.3</b> | <b>98.3</b> | <u>97.9</u> | <b>98.3</b> |
| 010_potted_meat_can    | 76.9  | 84.6 | 87.9        | <u>94.2</u> | 92.6        | <b>95.3</b> |
| 011_banana             | 73.2  | 77.6 | 96.0        | <u>97.6</u> | 97.2        | <b>98.4</b> |
| 019_pitcher_base       | 74.3  | 77.4 | 96.9        | <u>98.0</u> | 96.7        | <b>99.2</b> |
| 021_bleach_cleanser    | 70.9  | 75.4 | 95.9        | 97.3        | <u>98.4</u> | <b>99.3</b> |
| 024_bowl*              | 69.7  | 79   | 92.8        | <u>96.4</u> | 95.3        | <b>98.2</b> |
| 025_mug                | 75.3  | 80.6 | 96.0        | <u>97.1</u> | <u>97.1</u> | <b>98</b>   |
| 035_power_drill        | 74.3  | 82   | 95.7        | <u>97.2</u> | 96.9        | <b>98.3</b> |
| 036_wood_block*        | 70.2  | 85.8 | 91.1        | <u>93.2</u> | 90.7        | <b>94.3</b> |
| 037_scissors           | 66.4  | 81   | 87.2        | 92.1        | <u>94.9</u> | <b>97.2</b> |
| 040_large_marker       | 67.3  | 82.4 | 91.6        | <u>94.3</u> | 93.2        | <b>96.3</b> |
| 051_large_clamp*       | 66.2  | 72.2 | 95.6        | <u>96.2</u> | <u>96.2</u> | <b>98.3</b> |
| 052_extra_large_clamp* | 63.4  | 66.9 | 90.5        | 94.7        | <u>95.1</u> | <b>97.2</b> |
| 061_loam_brick*        | 70.2  | 80.3 | <u>98.2</u> | <b>98.4</b> | 96.6        | <u>98.2</u> |
| average                | 73.4  | 79.1 | 92.3        | 95.7        | <u>95.9</u> | <b>97.6</b> |

Table S.4. YCB-V Results. The ADD(S) AUC comparison of three keypoint voting-based methods (PVNet, PVN3D, RCVPose) in SISO mode using initially defined keypoints (FPS, BBox) and optimized keypoints (KGN) generated by KeyGNet.

| Metric          | Dataset | PVNet |      |             | PVN3D |      |             | RCVPose |             |             |
|-----------------|---------|-------|------|-------------|-------|------|-------------|---------|-------------|-------------|
|                 |         | FPS   | BBox | KGN         | FPS   | BBox | KGN         | FPS     | BBox        | KGN         |
| $AR_{VSD}$      | LMO     | 48.2  | 40.2 | 52.4        | 70.6  | 65.3 | <u>72.7</u> | 71.7    | 72.5        | <b>76.9</b> |
|                 | YCB-V   | 78.2  | 70.4 | 82.7        | 76.9  | 75.4 | 83.6        | 83.7    | <u>84.4</u> | <b>88.3</b> |
|                 | TLESS   | 65.7  | 58.7 | 67.2        | 68.3  | 66.7 | <u>72.2</u> | 70.4    | 70.8        | <b>75.3</b> |
|                 | TUDL    | 90.5  | 85.5 | 92.5        | 87.3  | 86.2 | 91.9        | 97.2    | <u>98.0</u> | <b>99.4</b> |
|                 | IC-BIN  | 70.6  | 64.3 | 72.6        | 67.2  | 63.4 | 73.9        | 73.7    | <u>74.1</u> | <b>80.4</b> |
|                 | ITODO   | 42.4  | 33.5 | 44.7        | 43.2  | 41.7 | 47.7        | 48.2    | <u>50.7</u> | <b>50.8</b> |
|                 | HB      | 77.1  | 74.3 | 78.7        | 78.4  | 75.6 | <u>84.4</u> | 81.6    | 82.5        | <b>85.9</b> |
| $AR_{MSSD}$     | LMO     | 66.4  | 60.2 | 70.2        | 62.5  | 61.3 | 69.3        | 72.7    | <u>73.4</u> | <b>73.6</b> |
|                 | YCB-V   | 77.3  | 68.7 | 79.8        | 79.9  | 77.4 | 82.9        | 83.8    | <u>86.3</u> | <b>89.6</b> |
|                 | TLESS   | 70.2  | 64.7 | 72.0        | 64.3  | 62.3 | 66.5        | 70.8    | <u>72.3</u> | <b>73.3</b> |
|                 | TUDL    | 90.6  | 84.7 | 91.8        | 91.9  | 88.9 | 93.1        | 96.7    | <u>97.5</u> | <b>98.5</b> |
|                 | IC-BIN  | 69.0  | 60.2 | 71.5        | 72.1  | 70.9 | <b>78.4</b> | 73.2    | <u>73.9</u> | 73.8        |
|                 | ITODO   | 51.2  | 43.3 | 51.3        | 52.6  | 51.7 | <u>58.3</u> | 56.2    | 57.2        | <b>64.2</b> |
|                 | HB      | 85.5  | 82.3 | <u>90.2</u> | 85.3  | 84.2 | 88.2        | 88.6    | 89.0        | <b>90.4</b> |
| $AR_{MSPD}$     | LMO     | 69.2  | 62.3 | 71.7        | 66.0  | 64.3 | 67.7        | 73.7    | <u>74.9</u> | <b>79.7</b> |
|                 | YCB-V   | 76.7  | 72.1 | 77.0        | 76.5  | 75.4 | 81.2        | 83.7    | <u>84.9</u> | <b>88.1</b> |
|                 | TLESS   | 67.3  | 60.2 | 71.1        | 69.3  | 67.8 | <u>72.1</u> | 70.2    | 71.5        | <b>77.7</b> |
|                 | TUDL    | 93.7  | 90.2 | 94.9        | 91.2  | 90.2 | 95.1        | 96.7    | <u>97.8</u> | <b>98.6</b> |
|                 | IC-BIN  | 72.3  | 64.3 | 75.4        | 71.8  | 70.2 | <b>77.6</b> | 72.7    | 73.9        | <u>75.6</u> |
|                 | ITODO   | 50.3  | 42.7 | 52.3        | 52.7  | 51.3 | 55.6        | 55.6    | <u>56.2</u> | <b>59.4</b> |
|                 | HB      | 84.8  | 81.2 | 86.0        | 84.7  | 83.4 | 90.2        | 89.2    | <u>90.5</u> | <b>93.0</b> |
| $AR_{average}$  | LMO     | 61.3  | 54.2 | 64.8        | 66.4  | 63.6 | 69.9        | 72.7    | <u>73.6</u> | <b>76.7</b> |
|                 | YCB-V   | 77.4  | 70.4 | 79.8        | 77.8  | 76.1 | 82.6        | 83.7    | <u>85.2</u> | <b>88.7</b> |
|                 | TLESS   | 67.7  | 61.2 | 70.1        | 67.3  | 65.6 | 70.3        | 70.5    | <u>71.5</u> | <b>75.4</b> |
|                 | TUDL    | 91.6  | 86.8 | 93.1        | 90.1  | 88.4 | 93.4        | 96.9    | <u>97.8</u> | <b>98.8</b> |
|                 | IC-BIN  | 70.6  | 62.9 | 73.2        | 68.2  | 70.4 | <b>76.6</b> | 73.2    | <u>74.0</u> | <b>76.6</b> |
|                 | ITODO   | 48.0  | 39.8 | 49.4        | 48.2  | 49.5 | 53.9        | 53.3    | <u>54.7</u> | <b>58.1</b> |
|                 | HB      | 82.5  | 79.3 | 85.0        | 82.8  | 81.1 | <u>87.6</u> | 86.5    | 87.3        | <b>89.7</b> |
| Overall Average |         | 71.3  | 64.9 | 73.6        | 72.0  | 70.7 | 76.3        | 76.7    | <u>77</u>   | <b>80.6</b> |

Table S.5. BOP Core Dataset Results. The Average Recall ( $AR$ ) of Visible Surface Discrepancy ( $AR_{VSD}$ ), Maximum Symmetry-Aware Surface Distance ( $AR_{MSSD}$ ), Maximum Symmetry-Aware Projection Distance ( $AR_{MSPD}$ ), and the overall average for all six BOP core datasets are reported for three methods by using keypoints selected by the original method (FPS/BBox) and KeyGNet (KGN).

| YCB-V<br>object        | PVNet       |             | PVN3D |             | RCVPose     |             |
|------------------------|-------------|-------------|-------|-------------|-------------|-------------|
|                        | FPS         | KGn         | FPS   | KGn         | BBox        | KGn         |
| 002_master_chef_can    | -5.6        | <u>-0.5</u> | -4.0  | <b>-0.4</b> | -2.6        | -1.1        |
| 003_cracker_box        | -4.5        | <u>-0.6</u> | -4.5  | <b>-0.2</b> | -2.1        | -1.0        |
| 004_sugar_box          | -6.9        | <b>-0.5</b> | -6.0  | <u>-0.8</u> | -3.4        | -1.0        |
| 005_tomato_soupcan     | -5.5        | <b>-0.4</b> | -7.5  | <b>-0.4</b> | -3.9        | <u>-0.9</u> |
| 006_mustard_bottle     | -8.9        | <u>-0.6</u> | -8.6  | <b>-0.5</b> | -3.5        | -1.3        |
| 007Auna_fish_can       | -6.4        | <b>-0.2</b> | -3.7  | <u>-0.6</u> | -2.5        | -1.0        |
| 008_pudding_box        | -3.5        | <b>-0.2</b> | -6.8  | <u>-0.6</u> | -2.0        | -0.9        |
| 009_gelatin_box        | -9.8        | <b>-0.3</b> | -7.7  | <u>-0.8</u> | -5.3        | -0.9        |
| 010_potted_meat_can    | -7.4        | <b>-0.5</b> | -5.4  | <b>-0.5</b> | -4.5        | <u>-1.4</u> |
| 011_banana             | -5.3        | <u>-0.8</u> | -5.1  | <b>-0.4</b> | -2.3        | -0.9        |
| 019_pitcher_base       | -6.5        | <b>-0.5</b> | -8.8  | <b>-0.5</b> | -3.6        | <u>-1.3</u> |
| 021_bleach_cleanser    | <u>-0.7</u> | <b>-0.5</b> | -3.7  | <u>-0.7</u> | -3.0        | -0.9        |
| 024_bowl*              | -2.8        | <b>-0.7</b> | -5.5  | <u>-0.8</u> | -4.3        | -0.9        |
| 025_mug                | -3.8        | <u>-0.8</u> | -4.2  | <b>-0.6</b> | -2.9        | -1.1        |
| 035_power_drill        | -6.7        | <b>-0.3</b> | -6.5  | <b>-0.3</b> | -3.2        | <u>-0.8</u> |
| 036_wood_block*        | -12.8       | <u>-0.6</u> | -8.2  | <b>-0.4</b> | -1.0        | -1.0        |
| 037_scissors           | -2.2        | <b>-0.6</b> | -4.0  | <b>-0.6</b> | -2.6        | <u>-1.3</u> |
| 040_large_marker       | -1.8        | <b>-0.5</b> | -7.4  | -6.3        | -6.7        | <u>-0.7</u> |
| 051_large_clamp*       | -10.5       | <u>-5.7</u> | -11.2 | -7.7        | <u>-5.7</u> | <b>-0.7</b> |
| 052_extra_large_clamp* | -10.8       | -5.5        | -12.7 | <b>-0.6</b> | -2.6        | <u>-1.2</u> |
| 061_loam_brick*        | -9.3        | <u>-0.7</u> | -8.8  | <b>-0.6</b> | -4.4        | -1.0        |
| average                | -6.3        | <b>-1.0</b> | -6.7  | <u>-1.2</u> | -3.4        | <b>-1.0</b> |

Table S.6. SISO-MIMO performance gap on YCB-V. The change in ADD(S) when converting from SISO to MIMO, for keypoints sampled heuristically (FPS or BBox) and KeyGNet (KGn). There is a relatively small change in ADD(S) AUC when the PE network is trained simultaneously on multiple objects using KGn keypoints.
